# Supplementary material for: Superconductivity in the Ce–B–H system at high pressure
Source: Royal Society of Chemistry journal article supplement (doi:10.1039/d4tc02905d), 2024-01-01
Supplement: d4tc02905d1.pdf [file d4tc02905d1.pdf]

## Supporting Information

### Superconductivity in Ce-B-H system at high pressure

Meixu Liu,<sup>a</sup> Wenwen Cui,<sup>a,\*</sup> Jingming Shi,<sup>a</sup> Artur P. Durajski<sup>b</sup>, Jian Hao  
and Yinwei Li<sup>a,†</sup>

<sup>a</sup> *Laboratory of Quantum Functional Materials Design and Application, School of  
Physics and Electronic Engineering, Jiangsu Normal University,  
Xuzhou 221116, China*

<sup>b</sup> *Institute of Physics, Czechoslovak Academy of Sciences, Ave. Armii Krajowej 19,  
42-200 Cze, stochowa, Poland*

Corresponding to: wenwencui@jsnu.edu.cn & yinwei\_li@jsnu.edu.cn

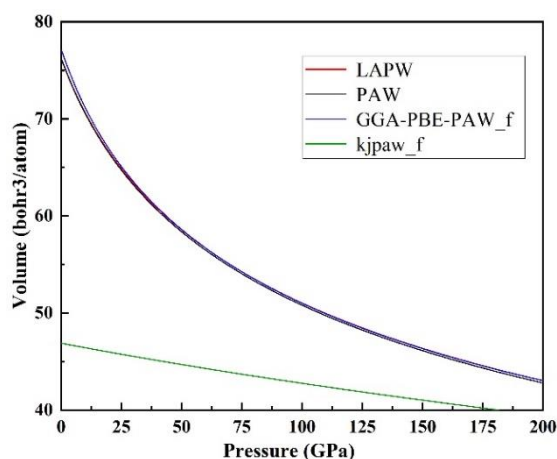

FIG. S1 Pressure-Volume diagrams of Ce element with GGA-PBE-PAW pseudopotential, ultrasoft pseudopotential, and all-electron pseudopotential

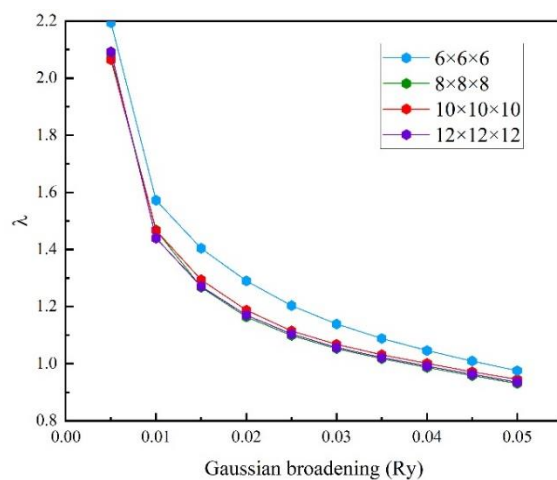

FIG. S2 Energy Electron-phonon coupling constant  $\lambda(q)$  as a function of the Gaussian broadening  $\sigma$  for Ce<sub>2</sub>BH<sub>14</sub> at q=0 at 100 GPa. We believe that 12×12×12 k-meshes are converged in Ce<sub>2</sub>BH<sub>14</sub>.

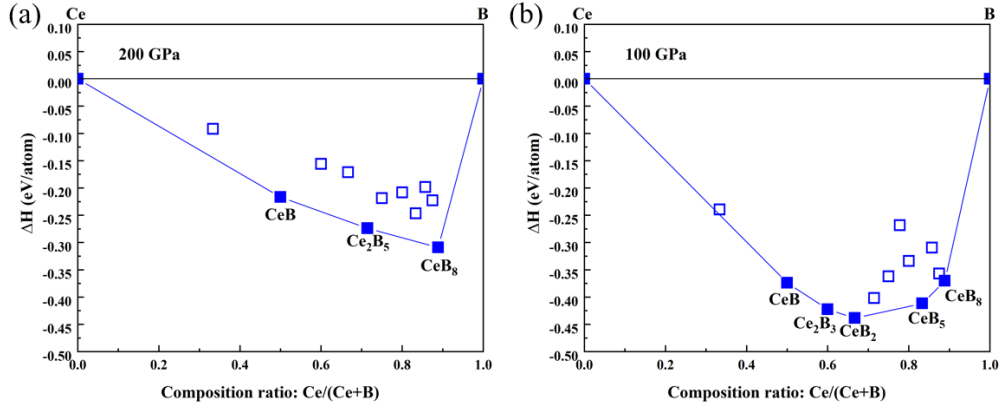

FIG. S3 Convex hull diagrams of Ce-B system at 100 GPa (a) and 200 GPa (b).

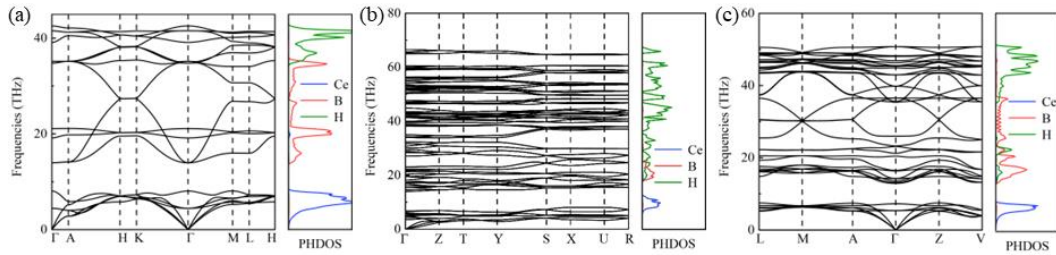

FIG. S4 Phonon dispersions, projected phonon density of states (PHDOS) of (a) CeBH, (b) CeBH<sub>7</sub>, and (c) CeB<sub>2</sub>H<sub>3</sub> at 100 GPa.

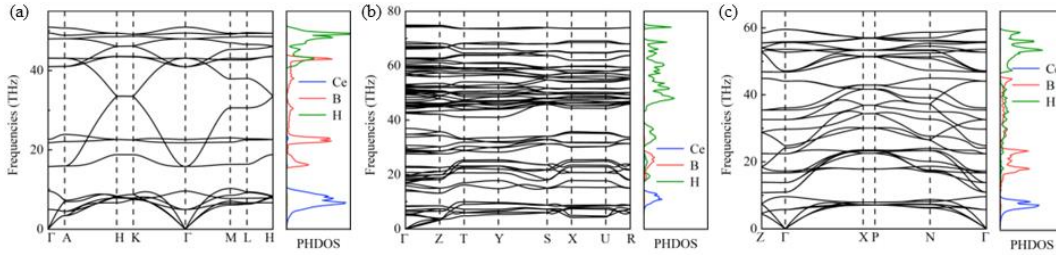

FIG. S5 Phonon dispersions, projected phonon density of states (PHDOS) of (a) CeBH, (b) CeBH<sub>7</sub>, and (c) CeB<sub>2</sub>H<sub>3</sub> at 200 GPa.

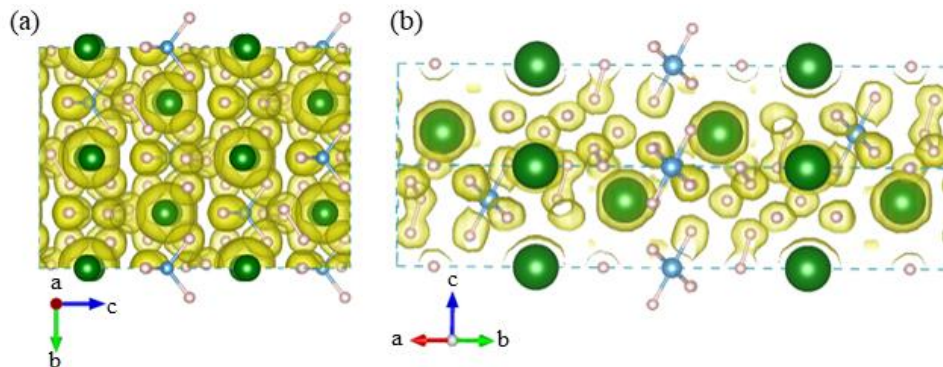

FIG. S6 Electron localization function (ELF) maps of (a) Ce<sub>2</sub>BH<sub>14</sub> (100 GPa), and (b) Ce<sub>2</sub>BH<sub>16</sub> (100 GPa).

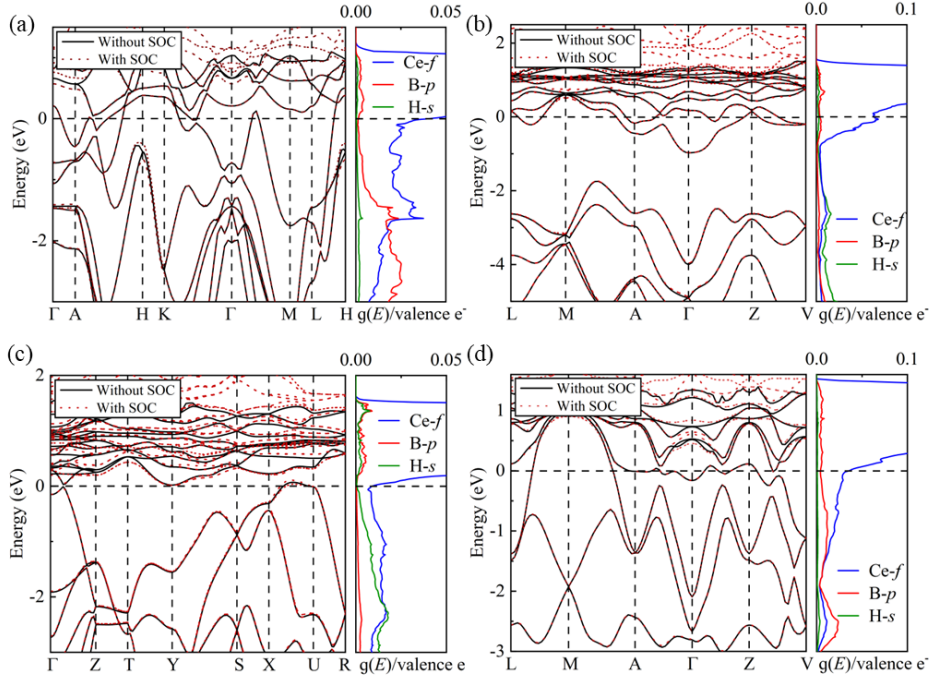

FIG. S7 Energy band, projected electronic density of states (PDOS) of (a) CeBH, (b) CeBH<sub>6</sub>, (c) CeBH<sub>7</sub>, and (d) CeB<sub>2</sub>H<sub>3</sub> at 100 GPa.

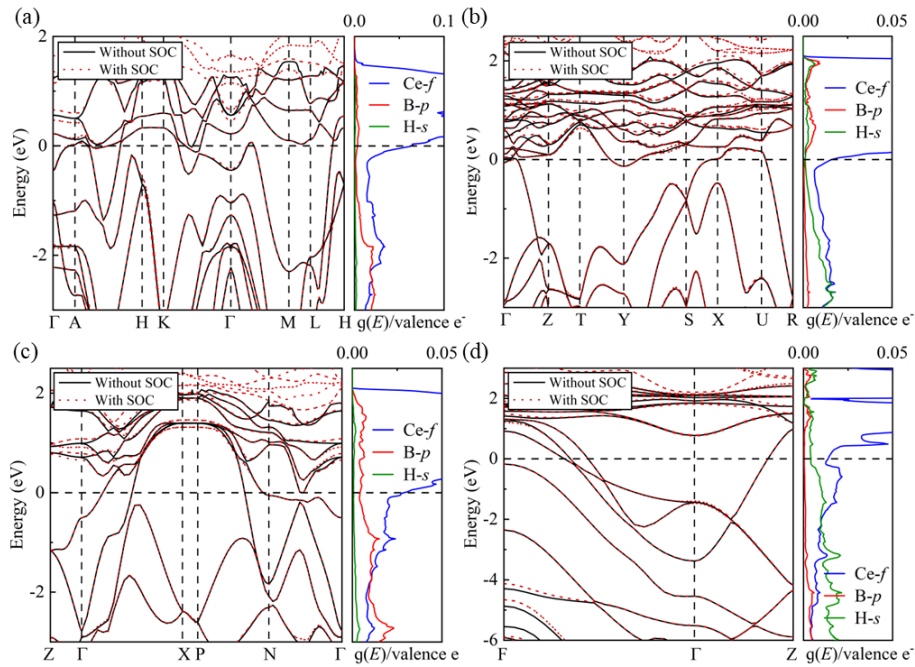

FIG. S8 Energy band, projected electronic density of states (PDOS) of (a) CeBH, (b) CeBH<sub>7</sub>, (c) CeB<sub>2</sub>H<sub>3</sub>, and (d) Ce<sub>2</sub>BH<sub>16</sub> at 200 GPa.

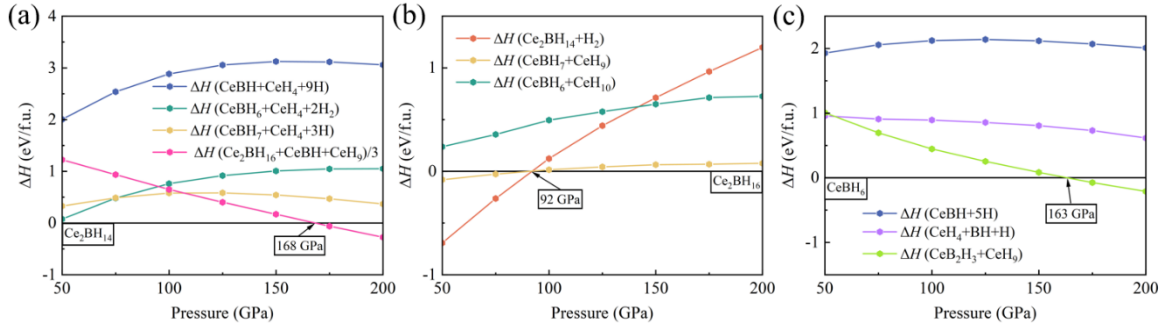

FIG. S9 The enthalpies per formula unit of various structures as a function of pressure for (a)  $\text{Ce}_2\text{BH}_{14}$  (b)  $\text{Ce}_2\text{BH}_{16}$  and (c)  $\text{CeBH}_6$ .

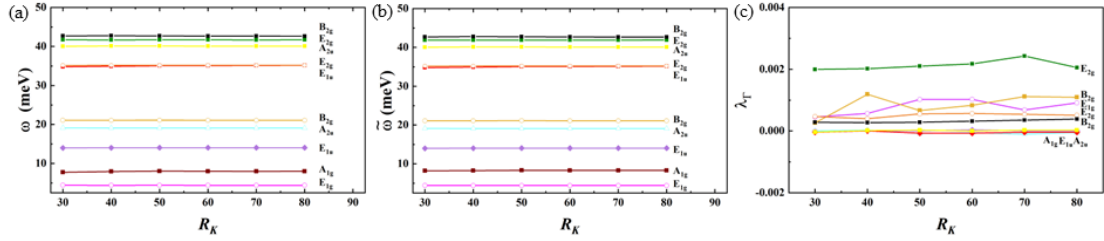

FIG. S10 Zone-center EPC strength calculations for  $\text{CeBH}$  at 100 GPa. (a) the screened phonon frequencies  $\omega$ . (b) unscreened phonon frequencies  $\tilde{\omega}$ . (c) zone-center EPC strength  $\lambda$ .  $R_k$  is the reciprocal lattice spacing that determines the  $k$  grid density. Each symbol (and color) represents one phonon mode.

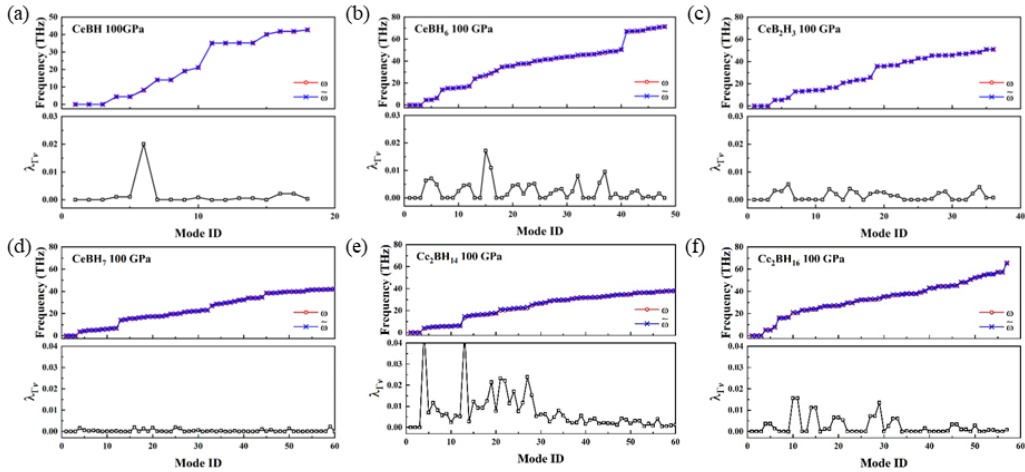

FIG. S11 (a) The screened and unscreened phonon frequencies (top panel) and zone-center EPC strength (bottom panel) of the (a)  $\text{CeBH}$ , (b)  $\text{CeBH}_6$ , (c)  $\text{CeB}_2\text{H}_3$ , (d)  $\text{CeBH}_7$ , (e)  $\text{Ce}_2\text{BH}_{14}$ -Fdd2-43 and (f)  $\text{Ce}_2\text{BH}_{16}$ -R-3m-166 at 100 GPa.

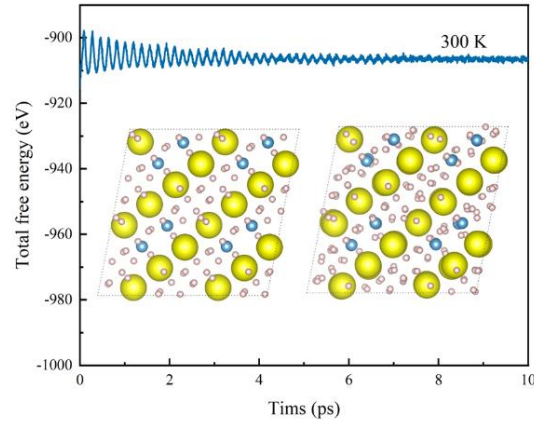

FIG. S11 the total free energy as a function of the ab initio molecular dynamics (AIMD) simulation time at 300 K under 100 GPa. The inset presents the structure snapshots of  $\text{Ce}_2\text{BH}_{16}$  at 0 and 10 ps, respectively.

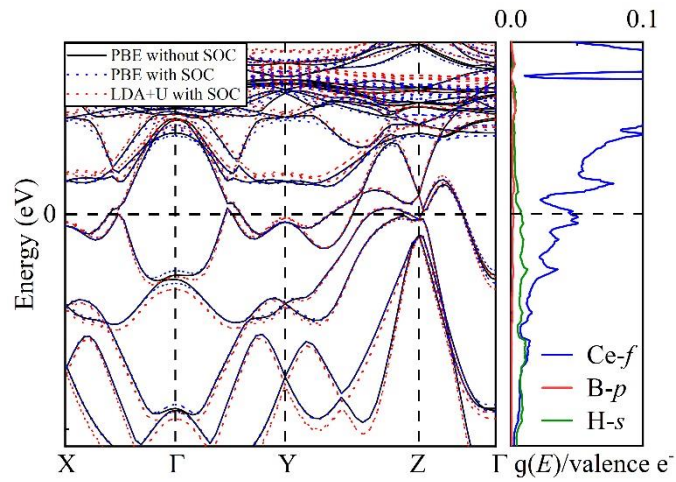

FIG. S12 Energy band of  $\text{Ce}_2\text{BH}_{14}$  at 100 GPa using PBE and LDA+U with/without the inclusion of SOC effect.

Table. S1 Structural information of Ce-B and Ce-B-H.compounds

| Space group<br>pressure                               | lattice<br>parameter<br>(Å, °)                                                     | atomic<br>coordinate | x      | y      | z      | sites     |
|-------------------------------------------------------|------------------------------------------------------------------------------------|----------------------|--------|--------|--------|-----------|
| CeB $R\bar{3}m$<br>200 GPa                            | $a=b=2.639$<br>$c=17.071$<br>$\alpha=\beta=90$<br>$\gamma=120$                     | Ce1                  | 0.000  | 0.000  | 0.103  | 6c        |
|                                                       |                                                                                    | B1                   | 0.000  | 0.000  | 0.331  | 6c        |
| CeB <sub>2</sub> $P6/mmm$<br>100 GPa                  | $a=b=2.791$<br>$c=3.855$<br>$\alpha=\beta=90$<br>$\gamma=120$                      | Ce1                  | 0.000  | 0.000  | 0.000  | 3a        |
|                                                       |                                                                                    | B1                   | 0.667  | 0.333  | 0.500  | 6c<br>18h |
| Ce <sub>2</sub> B <sub>3</sub> $R\bar{3}m$<br>100 GPa | $a=b=2.810$<br>$c=40.614$<br>$\alpha=\beta=90$<br>$\gamma=120$                     | Ce1                  | 0.667  | 0.333  | 0.472  | 4i        |
|                                                       |                                                                                    | Ce2                  | 0.333  | 0.667  | 0.620  | 4i        |
|                                                       |                                                                                    | B1                   | 0.667  | 0.333  | 0.667  | 4i        |
|                                                       |                                                                                    | B2                   | 0.000  | 0.000  | 0.428  | 2a        |
| Ce <sub>2</sub> B <sub>5</sub> $C2/m$<br>200 GPa      | $a=8.725$<br>$b=2.630$<br>$c=4.24$<br>$\alpha=90$<br>$\beta=79.258$<br>$\gamma=90$ | Ce1                  | -0.698 | 0.000  | 0.739  | 6c        |
|                                                       |                                                                                    | B1                   | -0.043 | 0.000  | 0.365  | 6c        |
|                                                       |                                                                                    | B2                   | -0.426 | 0.000  | 0.816  | 6c        |
|                                                       |                                                                                    | B3                   | 0.000  | 0.000  | 0.000  | 6c        |
| CeB <sub>5</sub> $P4/mmm$<br>100 GPa                  | $a=b=3.864$<br>$c=2.765$<br>$\alpha=\beta=\gamma=90$                               | Ce1                  | 0.000  | 0.000  | 0.000  | 1a        |
|                                                       |                                                                                    | B1                   | 0.500  | 0.500  | 0.000  | 2d        |
|                                                       |                                                                                    | B2                   | 0.201  | 0.500  | 0.500  |           |
| CeB <sub>8</sub> $R\bar{3}m$<br>200GPa                | $a=b=4.492$<br>$c=8.221$                                                           | Ce1                  | 0.000  | 0.000  | 0.000  | 3a        |
|                                                       |                                                                                    | B1                   | 0.000  | 0.000  | 0.281  | 6c        |
|                                                       |                                                                                    | B2                   | -0.276 | -0.138 | 0.429  | 18h       |
| CeBH $P6/mmm$<br>100 GPa                              | $a=b=2.822$<br>$c=6.545$<br>$\alpha=\beta=90$<br>$\gamma=120$                      | Ce1                  | 0.000  | 0.000  | 0.000  | 2e        |
|                                                       |                                                                                    | B1                   | 0.333  | 0.667  | 0.500  | 2d        |
|                                                       |                                                                                    | H1                   | 0.333  | 0.667  | 0.000  | 2c        |
|                                                       |                                                                                    |                      |        |        |        |           |
| CeBH <sub>6</sub> $C2/c$<br>100 GPa                   | $a=7.352$<br>$b=3.623$<br>$c=5.267$<br>$\alpha=\gamma=90$<br>$\beta=138.135$       | Ce1                  | -1.500 | 0.462  | -0.750 | 4e        |
|                                                       |                                                                                    | B1                   | -1.000 | 0.541  | -0.250 | 4e        |
|                                                       |                                                                                    | H1                   | -0.474 | 0.176  | -0.110 | 8f        |
|                                                       |                                                                                    | H2                   | -1.030 | 0.320  | -0.795 | 8f        |
|                                                       |                                                                                    | H3                   | -0.701 | 0.411  | -0.104 | 8f        |
| CeBH <sub>7</sub> $Pnma$<br>100 GPa                   | $a=7.352$<br>$b=3.623$<br>$c=5.267$<br>$\alpha=\beta=\gamma=90$                    | Ce1                  | 1.398  | 0.250  | 0.732  | 4c        |
|                                                       |                                                                                    | B1                   | 0.648  | 0.750  | 0.784  | 4c        |
|                                                       |                                                                                    | H1                   | 1.327  | 0.519  | 0.059  | 8d        |
|                                                       |                                                                                    | H2                   | 0.859  | 0.519  | 0.117  | 8d        |
|                                                       |                                                                                    | H3                   | 1.440  | 0.750  | 0.562  | 4c        |
|                                                       |                                                                                    | H4                   | 0.985  | 0.750  | 0.611  | 4c        |
| H5                                                    | 1.311                                                                              | 0.750                | 0.785  | 4c     |        |           |

|                                                                           |                          |        |        |        |        |     |
|---------------------------------------------------------------------------|--------------------------|--------|--------|--------|--------|-----|
| CeB <sub>2</sub> H <sub>3</sub> <i>C2/c</i><br>100 GPa                    | $a=b=4.284$              | Ce1    | -0.500 | 0.122  | 0.250  | 4e  |
|                                                                           | $c=9.435$                | B1     | -0.803 | 0.616  | 0.042  | 8f  |
|                                                                           | $\alpha=\gamma=90$       | H1     | -0.929 | 0.102  | -0.052 | 8f  |
|                                                                           | $\beta=132.742$          | H2     | -1.000 | 0.126  | -0.250 | 4e  |
| Ce <sub>2</sub> BH <sub>14</sub> <i>Fdd2</i><br>100 GPa                   | $a=7.2002$               | Ce1    | -0.750 | -0.750 | -0.752 | 8a  |
|                                                                           | $b=7.1316$               | Ce2    | -0.750 | -0.750 | -0.237 | 8a  |
|                                                                           | $c=10.2105$              | B1     | -0.750 | -0.750 | -0.494 | 8a  |
|                                                                           | $\alpha=\beta=\gamma=90$ | H1     | -0.516 | -0.762 | -0.371 | 16b |
|                                                                           |                          | H2     | -0.871 | -0.507 | -0.683 | 16b |
|                                                                           |                          | H3     | -0.750 | -0.616 | -0.930 | 16b |
|                                                                           |                          | H4     | -0.744 | -0.381 | -0.555 | 16b |
|                                                                           |                          | H5     | -0.750 | -0.886 | -0.424 | 16b |
|                                                                           | H6                       | -1.115 | -0.750 | -0.561 | 16b    |     |
|                                                                           | H7                       | -0.617 | -0.750 | -0.567 | 16b    |     |
| Ce <sub>2</sub> BH <sub>16</sub> <i>R<math>\bar{3}m</math></i><br>100 GPa | $a=b=3.685$              | Ce1    | 0.000  | 0.000  | 0.253  | 6c  |
|                                                                           | $c=17.347$               | B1     | 0.000  | 0.000  | 0.500  | 3b  |
|                                                                           | $\alpha=\beta=90$        | H1     | 0.000  | 0.000  | 0.625  | 6c  |
|                                                                           | $\gamma=120$             | H2     | 0.181  | -0.181 | 0.535  | 18h |
|                                                                           |                          | H3     | -0.170 | 0.170  | 0.358  | 18h |
|                                                                           | H4                       | 0.000  | 0.000  | 0.067  | 6c     |     |
